# Supplementary material for: Isolation and Functional Characterization of Erythrofibrase: An Alfa-Fibrinogenase Enzyme from Trimeresurus erythrurus Venom of North-East India
Source: MDPI journal article supplement (doi:10.3390/toxins16040201), 2024-04-22
Supplement: s1 [file s1]

# Supplementary Materials: Isolation and Functional Characterization of Erythrofibrase: An Alfa-Fibrinogenase Enzyme from *Trimeresurus erythrurus* Venom of North-East India

Susmita Thakur, Rafika Yasmin, Anita Malhotra, H. T. Lalremsanga, Vishal Santra, Surajit Giri and Robin Doley

**Table S1.** Peptide sequence of trypsin digested fragments of erythrofibrase obtained by LC-MS/MS analysis.

| Protein identity                         | Peptide fragments                              | Position | No. of peptides | z | MH+ [Da] | Score  |
|------------------------------------------|------------------------------------------------|----------|-----------------|---|----------|--------|
| Alpha-fibrinogenase albobifrase (P0CJ41) | KLLNEDEQIR                                     | 81-90    | 1               | 3 | 1257.68  | 294.83 |
|                                          | KLLNEDEQIRNPK                                  | 81-93    | 2               | 3 | 1597.85  |        |
|                                          | LLNEDEQIR                                      | 82-90    | 2               | 2 | 1129.58  |        |
|                                          | LLNEDEQIRNPK                                   | 82-93    | 2               | 3 | 1468.78  |        |
|                                          | LLNEDEQIRNPKEK                                 | 82-95    | 1               | 4 | 1725.91  |        |
|                                          | EKFICPNK                                       | 94-101   | 1               | 2 | 4344.26  |        |
|                                          | KSNEILDKDIMLIK                                 | 102-115  | 2               | 4 | 1675.93  |        |
|                                          | SNEILDK                                        | 103-109  | 1               | 2 | 2764.27  |        |
|                                          | SNEILDKDIMLIK                                  | 103-115  | 2               | 2 | 1531.84  |        |
|                                          | SNEILDKDIMLIKLDSPVSNSA-HIAPLSLPSSPPSVGVSVC     | 103-143  | 2               | 5 | 4344.26  |        |
|                                          | DIMLIK                                         | 110-115  | 2               | 1 | 732.43   |        |
|                                          | DIMLIKLDSPVSNSAHIAPLSLPSSPPSVGVSVC             | 110-143  | 2               | 4 | 3544.85  |        |
|                                          | LDSPVSNSAHIAPLSLPSSPPSVGVSVC                   | 116-143  | 2               | 3 | 2831.44  |        |
|                                          | IMGWGSTTPIEVTPDVPYCANINLLDDAECK-PGYPELLPEYR    | 144-187  | 3               | 4 | 4957.34  |        |
|                                          | TLCAGIVQGGK                                    | 188-198  | 2               | 1 | 1103.59  |        |
|                                          | TLCAGIVQGGKDTCCGDSGGPLICNEK                    | 188-214  | 2               | 2 | 2764.27  |        |
|                                          | DTCGGDSGGPLICNEK                               | 199-214  | 2               | 2 | 1679.7   |        |
|                                          | LHGIVSYGGHPCGQSHKPGIYTNVFDYNDWIQSI-IAGNTDATCLS | 214-248  | 1               | 5 | 4963.32  |        |
